# Supplementary material for: Irisin stimulates protective signaling pathways in rat hippocampal neurons
Source: PubMed Central journal article supplement (PMC9518673; doi:10.3389/fncel.2022.953991), 2022-09-09
Supplement: Data_Sheet_1.pdf [file Data_Sheet_1.pdf]

Supplementary Material

## Irisin stimulates protective signaling pathways in rat hippocampal neurons

Mychael V. Lourenco<sup>1\*</sup>, Guilherme B. de Freitas<sup>1,2</sup>, Ícaro Raony<sup>1</sup>,

Sergio T. Ferreira<sup>1,3\*</sup>, Fernanda G. De Felice<sup>1,2,4\*</sup>

<sup>1</sup>Institute of Medical Biochemistry Leopoldo de Meis, Federal University of Rio de Janeiro, Rio de Janeiro, RJ, Brazil

<sup>2</sup>Centre for Neuroscience Studies, Departments of Biomedical and Molecular Sciences & Psychiatry, Queen's University, Kingston, ON, Canada

<sup>3</sup>Institute of Biophysics Carlos Chagas Filho, Federal University of Rio de Janeiro, Rio de Janeiro, RJ, Brazil.

<sup>4</sup>D'Or Institute for Research and Education, Rio de Janeiro, RJ, Brazil

\*Corresponding authors: Fernanda G. De Felice ([fernanda.defelice@queensu.ca](mailto:fernanda.defelice@queensu.ca)), Sergio T. Ferreira ([ferreira@bioqmed.ufrj.br](mailto:ferreira@bioqmed.ufrj.br)) and Mychael V. Lourenco ([mychael@bioqmed.ufrj.br](mailto:mychael@bioqmed.ufrj.br)).

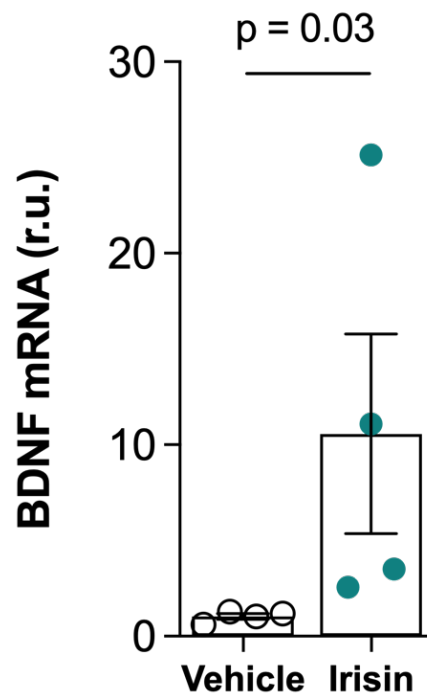

**Supplementary Figure 1. Treatment with recombinant irisin increases BDNF expression in primary rat hippocampal cultures.** BDNF expression (measured by qRT-PCR) in rat neuronal cultures treated with 25 nM irisin or vehicle for 24 h. Data were normalized by  $\beta$ -actin.  $p = 0.03$ , two-tailed ratio paired T-test.  $N = 4$  independent cultures. Each dot represents an independent experiment.
